# Supplementary material for: Mucuna and Avocado-Seed Residues as Sustainable Fertilizers and Biostimulants for Cherry Tomatoes
Source: MDPI journal article supplement (doi:10.3390/agrochemicals2040029), 2023-10-10
Supplement: s1 [file s1]

Archive with 1 entries (1 files):
- agrochemicals-2617110-supplementary.pdf
