# Supplementary material for: Mucuna and Avocado-Seed Residues as Sustainable Fertilizers and Biostimulants for Cherry Tomatoes
Source: MDPI journal article supplement (doi:10.3390/agrochemicals2040029), 2023-10-10
Supplement: s1 [file s1 › agrochemicals-2617110-supplementary.pdf]

Article:

# Mucuna and Avocado-Seed Residues as Sustainable Fertilizers and Biostimulants for Cherry Tomatoes

Journal: *Agrochemicals*

Authors: Alberto Camas-Reyes <sup>1</sup>, Andrés A. Estrada-Luna <sup>2</sup>, José de Jesús Ponce-Ramírez <sup>1</sup>, María Karina Manzo-Valencia <sup>3</sup>, Francisco Galván- Pantoja <sup>1</sup>, Martha Edith Moreno-Valencia <sup>1</sup>, Ana Lilia Hernández-Orihuela <sup>4</sup>, José Arbel Santiago-Díaz <sup>1</sup>, Silvia Valdés-Rodríguez <sup>3</sup>, and Agustino Martínez-Antonio <sup>1,\*</sup>

\*Corresponding author: Dr. Agustino Martínez-Antonio <sup>1,\*</sup>. Email: [agustino.martinez@cinvestav.mx](mailto:agustino.martinez@cinvestav.mx); [ama@biosintetica.mx](mailto:ama@biosintetica.mx)

Phone number: A.M.-A: + 52 (462) 624 9660

**Affiliation:** Laboratorio de Ingeniería Biológica, Departamento de Ingeniería Genética, Centro de Investigación y de Estudios Avanzados del IPN-Unidad Irapuato, 36824 Guanajuato, Mexico.

## A. Supplementary Figures for Cherry plants experiment

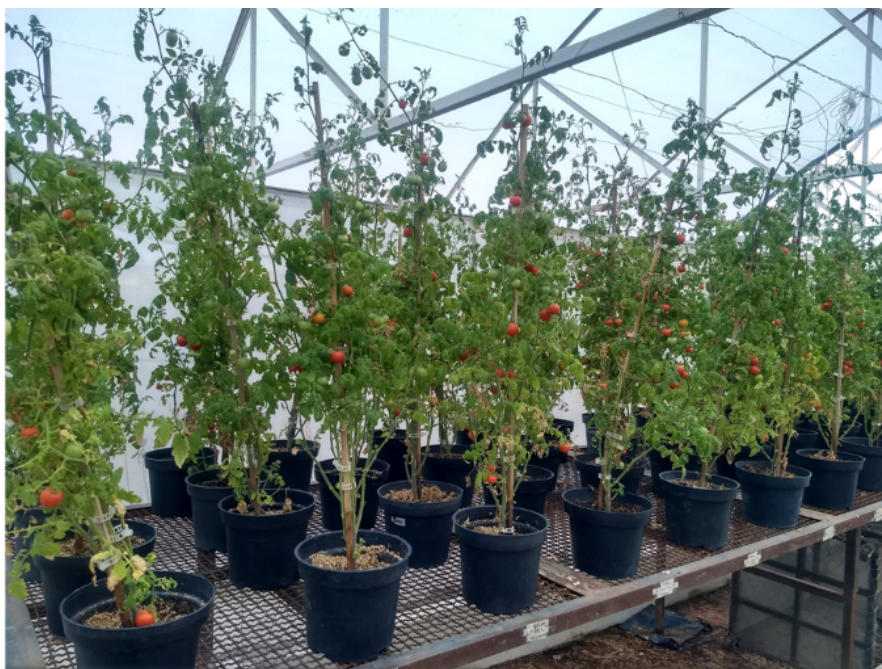

**Supplementary Figure S1.** A photograph of this experiment's Cherry tomato plants when growing in the greenhouse.

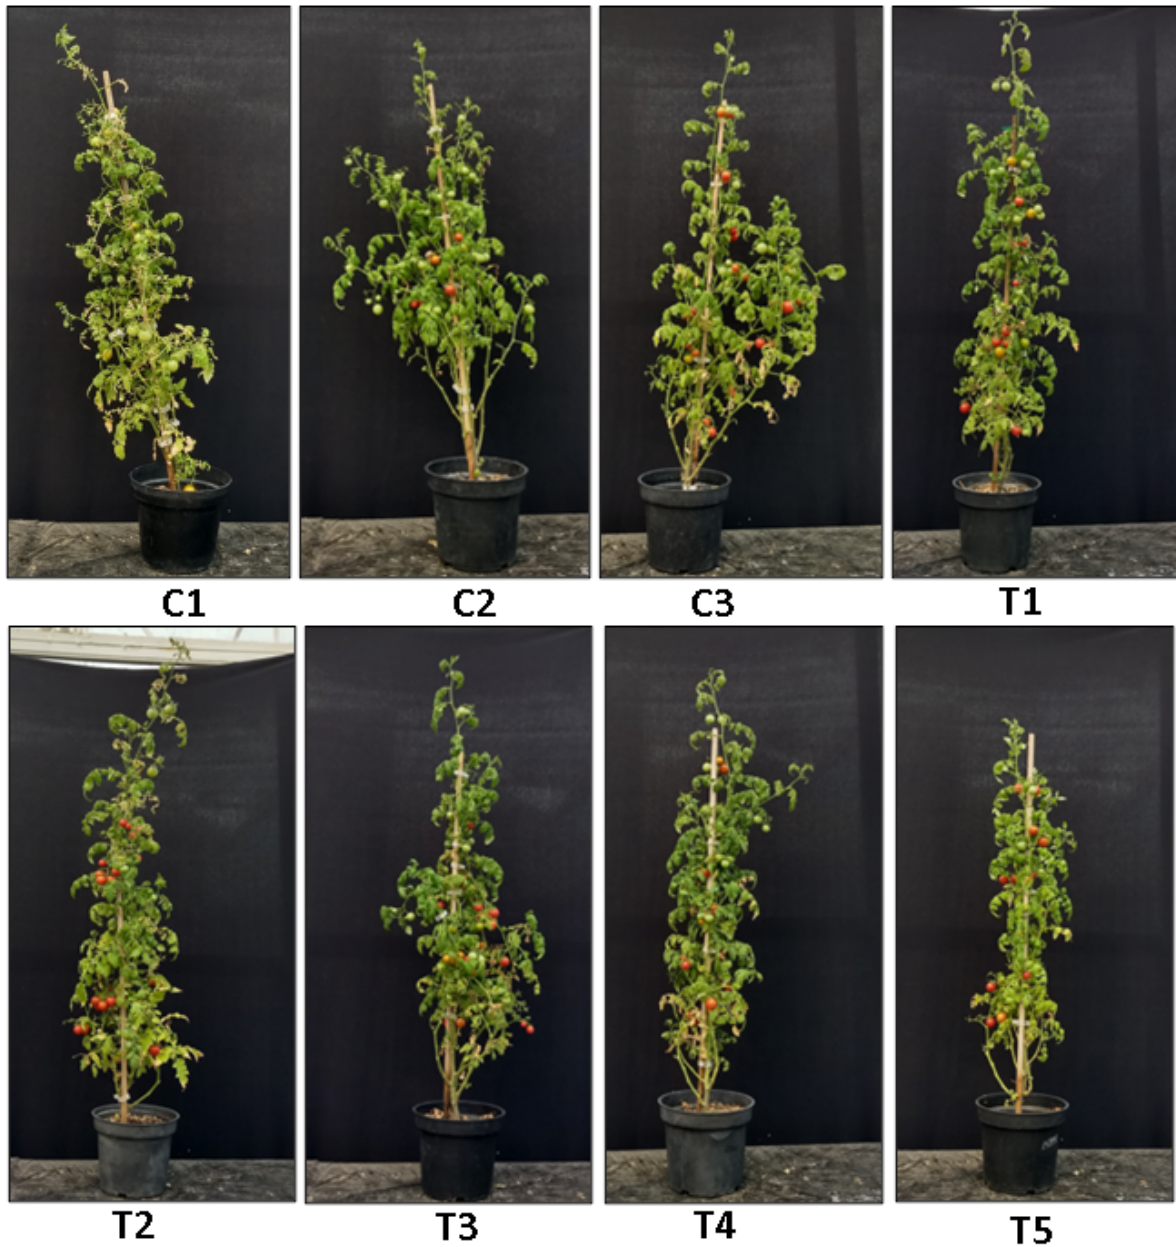

**Supplementary Figure S2. Plant height.** This photograph shows a representative comparison of plant stature among the different treatments. The plants that were treated with T1-T3 showed higher height than the others.

#### D. Supplementary figures of the agronomic measures

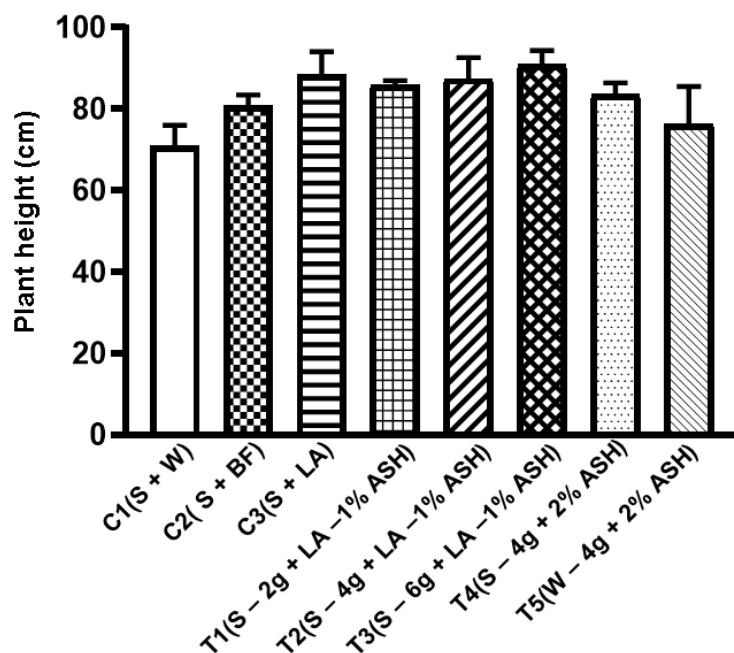

**Supplementary Figure S3. Plant height.** This graph shows differences in plant height among different treatments, although the differences were not statistically significant ( $p < 0.05$ ). C3, T2, and T3 treatments presented a higher difference compared to C1 treatment.

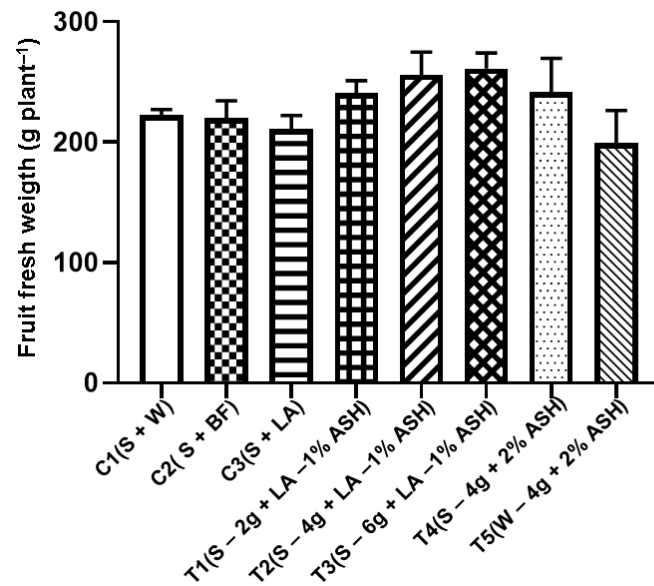

**Supplementary Figure S4. Fruit fresh weight.** There were not significant ( $p < 0.05$ ) differences in Cherry tomatoes fresh weight among the different treatments, although T2 and T3 treatments presented higher values than C1-C3 controls.

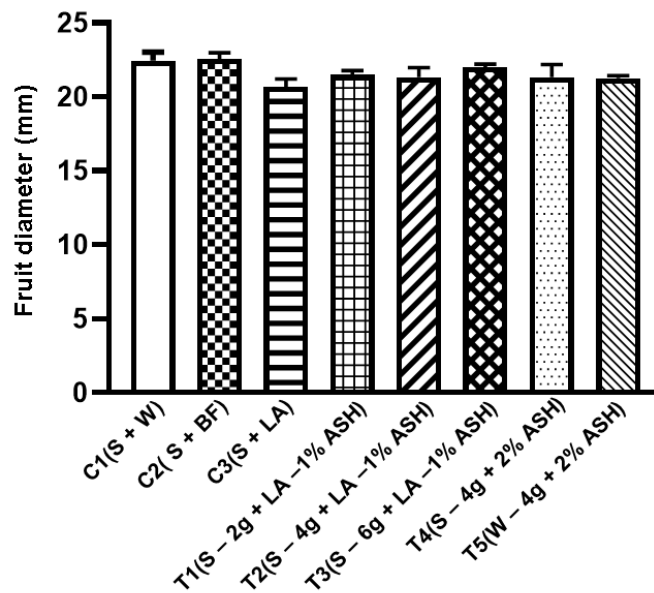

**Supplementary Figure S5. Fruit diameter (mm).** Fruits were not significantly different ( $p < 0.05$ ) in equatorial circumference.

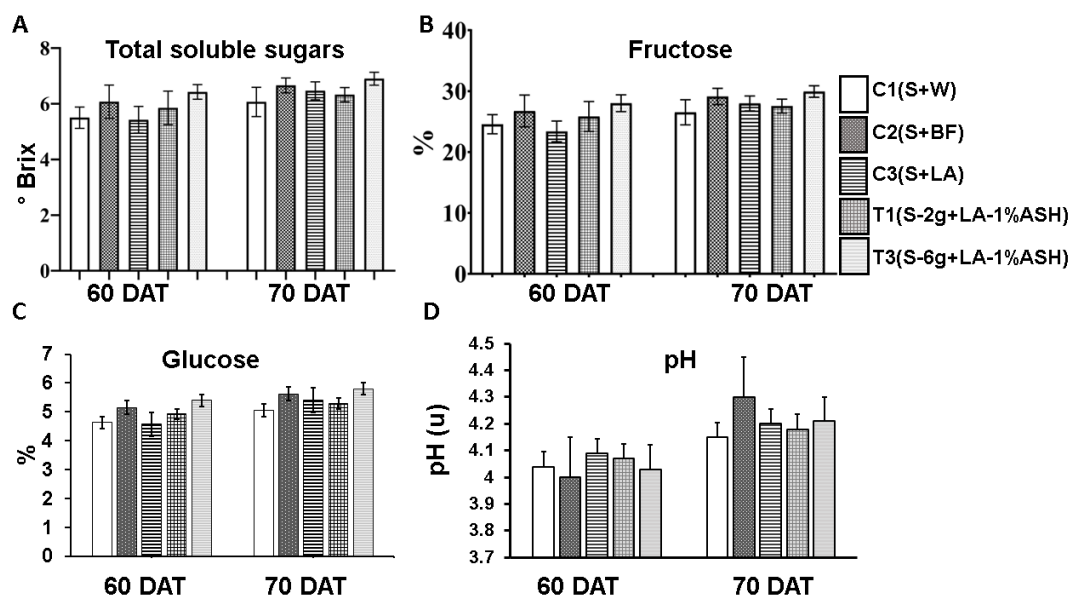

**Supplementary Figure S6. Fruit quality of Cherry tomatoes.** Measurement of sugar concentration and pH trend of the fruits at 60 and 70 days after transplanting. DAT = days after transplanting.

#### E. COMPLEMENTARY PHOTOS OF THE FRUITS

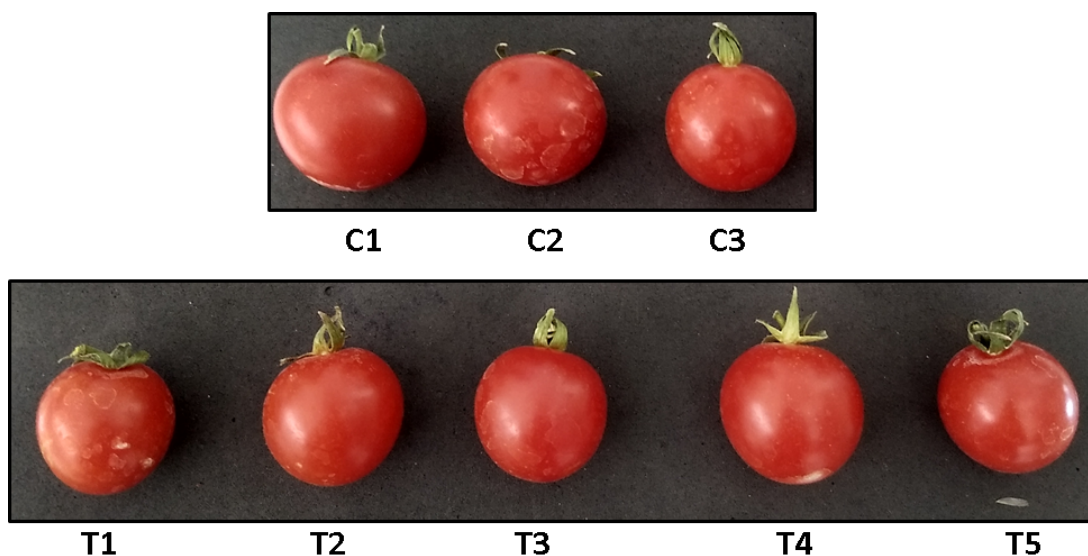

**Supplementary Figure S7. Mature fruits.** The picture shows a representative view of ripe fruits harvested four months after transplanting. All fruits had an intense red color.

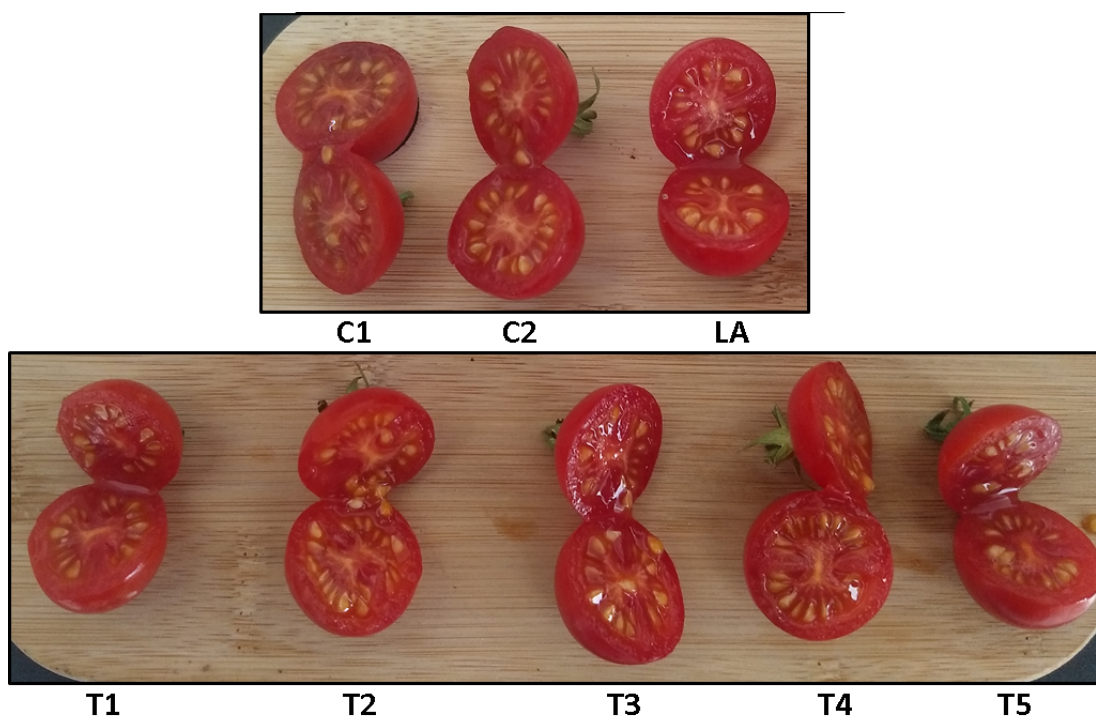

**Supplementary Figure S8. Inside view.** Cross sections of tomato fruit tissues present normal characteristics. For instance, on mesocarp thickness, and placenta or seed size.

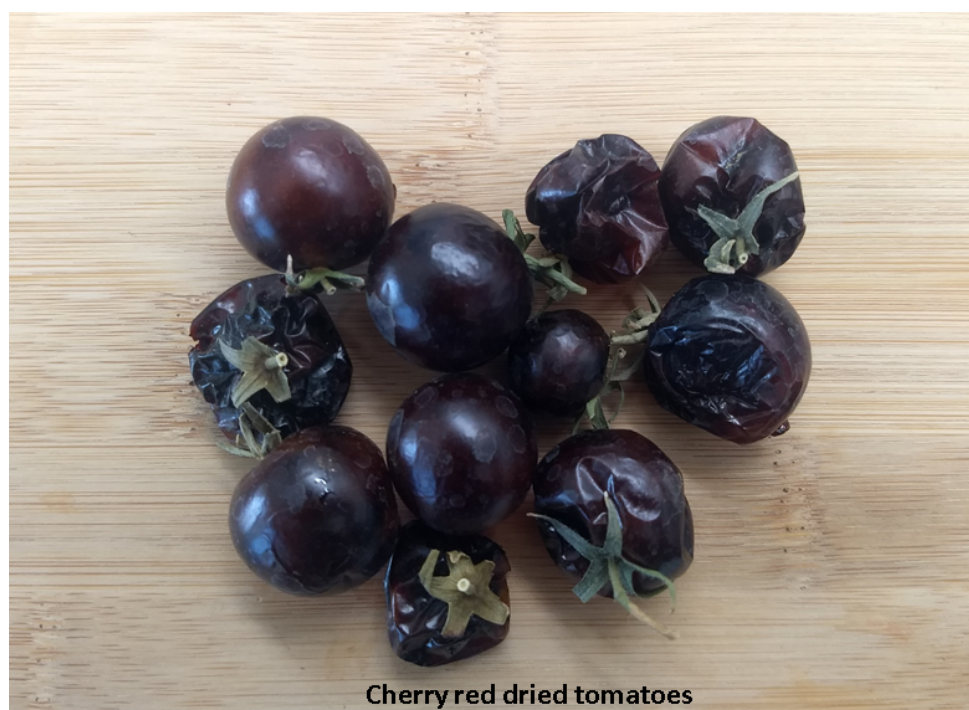

**Supplementary Figure S9.** A sample of dried tomatoes after incubation in an oven at 60°C for 72 hr.

## B. SUPPLEMENTARY TABLES CONTAIN THE DATA OF THE EVALUATED AGRONOMIC PARAMETERS

**Supplementary Table S1. Plant height data (cm).** Each value represents the average measure per plant from six measuring dates.

| C1    | C2    | C3     | T1    | T2    | T3     | T4    | T5    |
|-------|-------|--------|-------|-------|--------|-------|-------|
| 82.55 | 84.85 | 85.60  | 85.48 | 72.95 | 86.75  | 80.93 | 49.82 |
| 71.70 | 85.47 | 100.77 | 88.73 | 86.78 | 88.05  | 76.43 | 77.23 |
| 71.70 | 74.08 | 73.93  | 85.95 | 96.72 | 101.32 | 88.18 | 88.95 |
| 57.43 | 78.35 | 93.00  | 82.87 | 94.22 | 87.25  | 88.40 | 89.12 |

**Supplementary Table S2. Number of flowers data.** Each value represents the average number of flowers per plant from six count dates

| C1    | C2    | C3    | T1    | T2    | T3    | T4    | T5    |
|-------|-------|-------|-------|-------|-------|-------|-------|
| 26.00 | 20.83 | 23.50 | 27.67 | 31.17 | 33.67 | 20.17 | 33.00 |
| 18.50 | 20.17 | 23.33 | 30.83 | 15.67 | 24.50 | 23.17 | 32.67 |
| 23.33 | 16.17 | 18.33 | 20.17 | 27.33 | 26.83 | 20.67 | 22.33 |
| 14.17 | 23.17 | 32.00 | 17.83 | 36.33 | 34.83 | 36.67 | 25.00 |

**Supplementary Table S3. Fruit number data.** Each value represents the average number of fruits per plant from five harvesting dates

| C1    | C2    | C3    | T1    | T2    | T3    | T4    | T5    |
|-------|-------|-------|-------|-------|-------|-------|-------|
| 13.20 | 11.40 | 17.40 | 16.40 | 14.40 | 21.00 | 19.60 | 9.60  |
| 12.40 | 7.40  | 14.00 | 12.60 | 15.00 | 16.00 | 16.20 | 13.40 |
| 11.60 | 11.60 | 11.80 | 12.80 | 17.00 | 16.80 | 14.80 | 14.00 |
| 10.40 | 13.80 | 14.00 | 17.80 | 16.60 | 14.60 | 14.00 | 14.20 |

**Supplementary Table S4. Fruit fresh weight data (g).** Each value represents the average weight of the sum of fresh weights of five harvesting dates per plant

| C1    | C2    | C3    | T1    | T2    | T3    | T4    | T5    |
|-------|-------|-------|-------|-------|-------|-------|-------|
| 222.5 | 240.4 | 196.6 | 238.8 | 200.3 | 273.8 | 315.8 | 139.3 |
| 233.0 | 179.9 | 244.4 | 218.2 | 279.4 | 247.8 | 252.6 | 190.2 |

|       |       |       |       |       |       |       |       |
|-------|-------|-------|-------|-------|-------|-------|-------|
| 223.9 | 240.4 | 205.0 | 239.1 | 279.9 | 290.6 | 206.4 | 271.6 |
| 210.5 | 219.3 | 197.5 | 267.6 | 264.0 | 232.1 | 192.0 | 195.4 |

**Supplementary Table S5. Fruit dry weight data (g).** Each value represents the average weight of the sum of dry weights of five harvesting dates per plant

| C1    | C2    | C3    | T1    | T2    | T3    | T4    | T5    |
|-------|-------|-------|-------|-------|-------|-------|-------|
| 26.10 | 28.70 | 22.60 | 31.50 | 28.00 | 36.10 | 41.60 | 14.10 |
| 31.20 | 19.70 | 27.90 | 36.70 | 42.30 | 37.90 | 33.00 | 27.10 |
| 25.20 | 28.70 | 24.50 | 29.90 | 37.10 | 37.70 | 29.50 | 33.80 |
| 25.80 | 23.30 | 24.70 | 33.70 | 30.70 | 28.00 | 22.70 | 25.90 |

**Supplementary Table S6. Fruit diameter data (mm).** Each value represents the average weight of the sum of dry weights of ten harvesting dates per plant

| C1    | C2    | C3    | T1    | T2    | T3    | T4    | T5    |
|-------|-------|-------|-------|-------|-------|-------|-------|
| 23.76 | 21.68 | 19.86 | 20.73 | 20.67 | 22.07 | 22.50 | 21.38 |
| 21.25 | 23.44 | 19.86 | 21.53 | 23.21 | 21.45 | 21.65 | 20.76 |
| 21.68 | 23.13 | 21.97 | 21.47 | 20.26 | 21.98 | 22.38 | 21.21 |
| 23.12 | 22.00 | 21.14 | 22.19 | 21.22 | 22.50 | 18.82 | 21.69 |

## C. ANOVA TABLES WITH THE RESULTS OF THE STATISTIC ANALYSIS.

**Supplementary Table S7.** ANOVA statistics for plant height

| Source     | DF | SS(Adj) | MS (Adj) | F-Value | p-Value |
|------------|----|---------|----------|---------|---------|
| Treatments | 7  | 1262.00 | 180.3    | 1.790   | 0.1359  |
| Residual   | 24 | 2417.00 | 100.7    |         |         |
| Total      | 31 | 3679.00 |          |         |         |

No significant ( $p < 0.05$ ) at 95% of confidence level.

**C V= 12.4 %**

**Supplementary Table S8.** ANOVA statistics for flowers production

| Source     | DF | SS (Adj) | MS (Adj) | F-Value | p-Value |
|------------|----|----------|----------|---------|---------|
| Treatments | 7  | 1001.0   | 100.1    | 2.6540  | *0.0170 |
| Residual   | 24 | 1244.0   | 37.71    |         |         |

|       |    |        |
|-------|----|--------|
| Total | 31 | 2245.0 |
|-------|----|--------|

\* Significance ( $P < 0.05$ ) at 95 % confidence level.

**CV = 23.4 %**

**Supplementary Table S9.** *ANOVA statistics for the number of fruits*

| Source     | DF | SS (Adj) | MS (Adj) | F-Value | p-Value |
|------------|----|----------|----------|---------|---------|
| Treatments | 7  | 129.10   | 18.44    | 3.635   | *0.0082 |
| Residual   | 24 | 121.80   | 5.074    |         |         |
| Total      | 31 | 250.90   |          |         |         |

\* Significance ( $P < 0.05$ ) at 95 % of confidence level.

**CV = 15.8 %**

**Supplementary Table S10.** *ANOVA statistics for fruit fresh weight*

| Source     | DF | SS (Adj) | MS (Adj) | F-Value | p-Value |
|------------|----|----------|----------|---------|---------|
| Treatments | 7  | 13403.0  | 1215.0   | 1.528   | 0.2053  |
| Residual   | 24 | 30068.0  | 1953.0   |         |         |
| Total      | 31 | 43470.0  |          |         |         |

No significant ( $p < 0.05$ ) at 95% of confidence level.

**CV = 15.3%**

**Supplementary Table S11.** *ANOVA statistics for fruit dry weight*

| Source     | DF | SS (Adj) | MS (Adj) | F-Value | p-Value |
|------------|----|----------|----------|---------|---------|
| Treatments | 7  | 495.5    | 70.78    | 2.483   | *0.0453 |
| Residual   | 24 | 684.3    | 28.51    |         |         |
| Total      | 31 | 1180.0   |          |         |         |

\* Significance ( $P < 0.05$ ) at 95 % of confidence level.

**CV = 18.5 %**

**Supplementary Table S12.** *ANOVA statistics for fruit diameter*

| Source     | DF | SS (Adj) | MS (Adj) | F-Value | p-Value |
|------------|----|----------|----------|---------|---------|
| Treatments | 7  | 11.41    | 1.631    | 1.565   | 0.2063  |
| Residual   | 24 | 25.66    | 1.069    |         |         |
| Total      | 31 | 37.07    |          |         |         |

No significant ( $p < 0.05$ ) at 95% of confidence level.

**CV = 5.0 %**
